# Supplementary material for: Reduced graphene oxide-supported methylene blue nanocomposite as a glucose oxidase-mimetic for electrochemical glucose sensing
Source: Royal Society of Chemistry journal article supplement (doi:10.1039/c8ra06208k), 2018-01-01
Supplement: c8ra06208k1.pdf [file c8ra06208k1.pdf]

## Supplementary Information

### Reduced graphene oxide-supported methylene blue nanocomposite as a glucose oxidase-mimetic for electrochemical glucose sensing

Shaojun Yang<sup>a</sup>, Daliang Liu<sup>a</sup>, Qing Bo Meng<sup>a</sup>, Shuyao Wu<sup>a\*</sup>, Xi-Ming Song<sup>a\*</sup>

Liaoning Key Laboratory for Green Synthesis and Preparative Chemistry of Advanced Materials, College of Chemistry, Liaoning University, Shenyang 110036, China

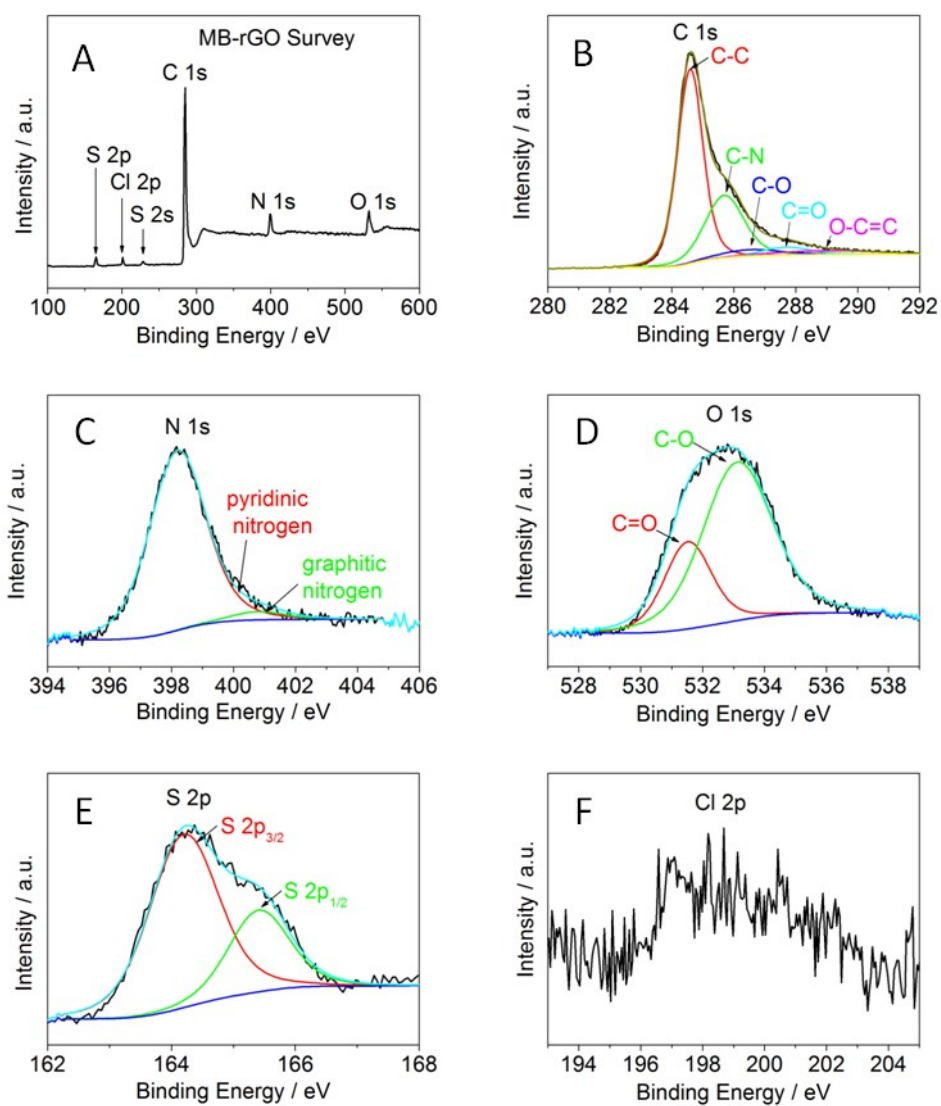

Fig. S1 XPS spectra of the MB-rGO nanocomposite: (A) survey spectra; (B) C 1s; (C) N 1s; (D) O 1s; (E) S 2p; (F) Cl 2p.

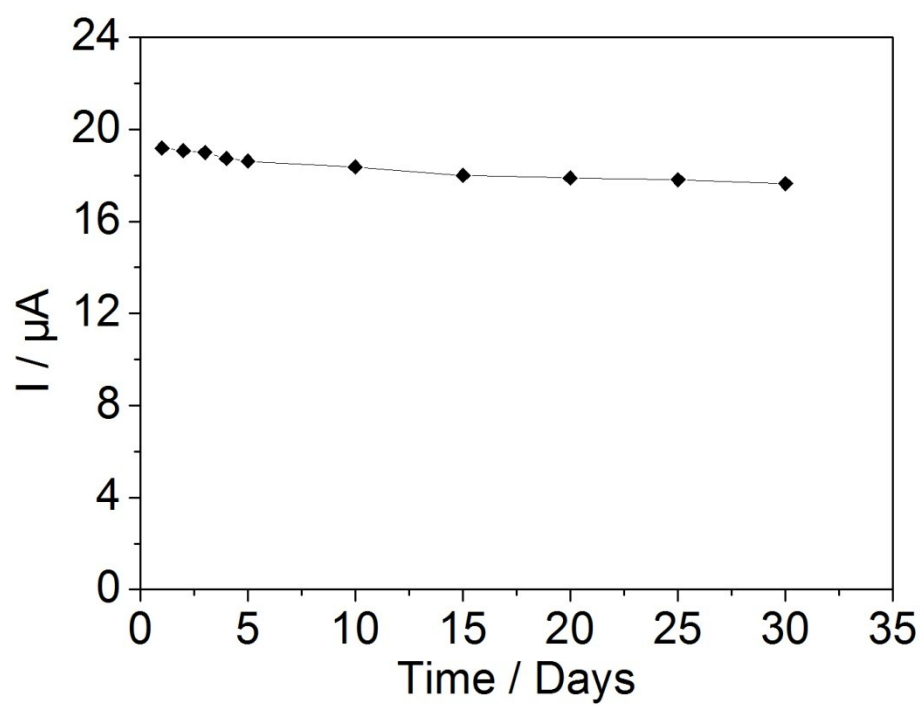

Fig. S2 Variation of response currents for the determination of 5 mM glucose at the MB-rGO/GC electrode with time (in days).
